# Supplementary material for: What Are the Experiences of Mental Health Practitioners Involved in a Coroner’s Inquest and Other Inquiry Processes after an Unexpected Death of a Patient? A Systematic Review and Thematic Synthesis of the Literature
Source: MDPI journal article supplement (doi:10.3390/ijerph21030357), 2024-03-18
Supplement: s1 [file s1]

## Supplementary File S1: Search terms

### MEDLINE SEARCH STRATEGY

Search Strategy:

- 
- 1 community health workers/ or nursing assistants/ or psychiatric aides/ or nurses, community health/ or occupational therapists/ or general practitioners/ or occupational health physicians/ or psychotherapists/ (23357)
  - 2 \*psychiatry/ or \*adolescent psychiatry/ or \*child psychiatry/ or exp \*forensic psychiatry/ or \*military psychiatry/ or \*psychoanalysis/ or exp \*psychology/ or \*mental health services/ or emergency services, psychiatric/ or \*schizophrenic psychology/ (160862)
  - 3 "Coroners and Medical Examiners"/ (2188)
  - 4 mental health practitioner\*.ti,ab. (903)
  - 5 psychiatrist\*.ti,ab. (28269)
  - 6 psychologist\*.ti,ab. (18617)
  - 7 (mental health adj3 (consultant\* or trainee\* or personnel\* or staff or professional\* or counsel\*)).ti,ab. (10771)
  - 8 (therapist\* or social work\*).ti,ab. (62811)
  - 9 or/1-8 (281155)
  - 10 medical errors/ or near miss, healthcare/ (17967)
  - 11 "Root Cause Analysis"/ (418)
  - 12 "Cause of Death"/ (53373)
  - 13 serious investigation\*.ti,ab. (58)
  - 14 serious untoward incident\*.ti,ab. (16)
  - 15 patient safety event\*.ti,ab. (402)
  - 16 patient safety incident\*.ti,ab. (603)
  - 17 (safety adj3 inquir\*).ti,ab. (71)
  - 18 (incident\* adj3 inquir\*).ti,ab. (14)
  - 19 (coron\* adj3 (inquest\* or court\* or inquir\*)).ti,ab. (334)
  - 20 "root cause analysis".ti,ab. (1394)
  - 21 or/10-20 (73467)
  - 22 attitude/ or exp "attitude of health personnel"/ or attitude to death/ or exp attitude to health/ or catastrophization/ or optimism/ or pessimism/ or respect/ or stereotyping/ (674058)
  - 23 perception/ or discrimination, psychological/ or perceived discrimination/ or social cognition/ or exp decision making/ or judgment/ (305324)
  - 24 scapegoating/ or psychological distance/ or social stigma/ (15575)
  - 25 (perceive\* or perception\* or personal satisfaction or perspective\* or view\* or experience\* or need\* or issue\*).ti,ab. (4800229)
  - 26 (belief\* or believe\* or opinion\* or feel\* or knowledge\* or understand\* or expectation\* or attitude\* or thought\*).ti,ab. (3107277)
  - 27 22 or 23 or 24 or 25 or 26 (7295348)
  - 28 9 and 21 and 27 (523)
  - 29 limit 28 to english language (479)

\*\*\*\*\*

### EMBASE SEARCH STRATEGY

Search Strategy:

- 
- 1 mental health care personnel/ (4491)
  - 2 psychiatrist/ (31586)
  - 3 psychologist/ or social worker/ (28801)
  - 4 coroner/ or psychotherapist/ (10233)
  - 5 occupational therapist/ (8106)
  - 6 psychiatric nursing/ or community psychiatric nursing/ (14402)
  - 7 \*general practitioner/ (26281)
  - 8 mental health practitioner\*.ti,ab. (1094)

- 9 psychiatrist\*.ti,ab. (43252)
- 10 psychologist\*.ti,ab. (28182)
- 11 (mental health adj3 (consultant\* or trainee\* or personnel\* or staff or professional\* or  
counsel\*)).ti,ab. (13303)
- 12 (therapist\* or social work\*).ti,ab. (91572)
- 13 or/1-12 (227740)
- 14 \*"cause of death"/ (12143)
- 15 "root cause analysis"/ (2789)
- 16 medical error/ or medical accident/ or "near miss (health care)"/ (20655)
- 17 therapeutic error/ (1799)
- 18 serious investigation\*.ti,ab. (71)
- 19 serious untoward incident\*.ti,ab. (61)
- 20 patient safety event\*.ti,ab. (527)
- 21 patient safety incident\*.ti,ab. (802)
- 22 (safety adj3 inquir\*).ti,ab. (102)
- 23 (incident\* adj3 inquir\*).ti,ab. (22)
- 24 (coron\* adj3 (inquest\* or court\* or inquir\*)).ti,ab. (365)
- 25 "root cause analys?s".ti,ab. (2849)
- 26 or/14-25 (39204)
- 27 \*attitude/ or attitude to death/ or attitude to health/ or attitude to illness/ or attitude to life/ or  
attitude to mental illness/ or employee attitude/ or health personnel attitude/ or optimism/ or  
pessimism/ or respect/ or risk attitude/ or social worker attitude/ (245860)
- 28 \*perceptive discrimination/ (4470)
- 29 \*stigma/ (5089)
- 30 social stigma/ (13111)
- 31 social discrimination/ or employment discrimination/ (5906)
- 32 clinical decision making/ or ethical decision making/ or medical decision making/ (155569)
- 33 scapegoating/ (17)
- 34 (perceive\* or perception\* or personal satisfaction or perspective\* or view\* or experience\* or  
need\* or issue\*).ti,ab. (6239143)
- 35 (belief\* or believe\* or opinion\* or feel\* or knowledge\* or understand\* or expectation\* or  
attitude\* or thought\*).ti,ab. (3806712)
- 36 or/27-35 (8874212)
- 37 13 and 26 and 36 (438)
- 38 limit 37 to english language (422)

\*\*\*\*\*

## PSYCINFO SEARCH STRATEGY

Search Strategy:

---

- 1 exp mental health personnel/ (56471)
- 2 exp social workers/ (14215)
- 3 counselors/ (9188)
- 4 therapists/ or occupational therapists/ (14701)
- 5 exp psychologists/ (34628)
- 6 \*general practitioners/ (4196)
- 7 mental health practitioner\*.ti,ab. (3234)
- 8 psychiatrist\*.ti,ab. (42176)
- 9 psychologist\*.ti,ab. (91512)
- 10 (mental health adj3 (consultant\* or trainee\* or personnel\* or staff or professional\* or  
counsel\*)).ti,ab. (24803)
- 11 (therapist\* or social work\*).ti,ab. (135249)
- 12 or/1-11 (316717)
- 13 exp causal analysis/ (7556)
- 14 \*patient safety/ (1902)
- 15 accidents/ (2915)

16 \*errors/ or error analysis/ (9594)  
 17 serious investigation\*.ti,ab. (33)  
 18 serious untoward incident\*.ti,ab. (11)  
 19 patient safety event\*.ti,ab. (53)  
 20 patient safety incident\*.ti,ab. (72)  
 21 (safety adj3 inquir\*).ti,ab. (19)  
 22 (incident\* adj3 inquir\*).ti,ab. (20)  
 23 (coron\* adj3 (inquest\* or court\* or inquir\*)).ti,ab. (111)  
 24 "root cause analys?s".ti,ab. (144)  
 25 or/13-24 (22165)  
 26 \*attitudes/ or counselor attitudes/ or death attitudes/ or employee attitudes/ or employer  
 attitudes/ or health attitudes/ or exp health personnel attitudes/ or occupational attitudes/ or  
 "physical illness (attitudes toward)/ or psychologist attitudes/ or stereotyped attitudes/ or "work  
 (attitudes toward)/ (110078)  
 27 perceptual discrimination/ or social discrimination/ (6192)  
 28 \*stigma/ or mental health stigma/ (12184)  
 29 \*social cognition/ or social categorization/ (13343)  
 30 \*decision making/ (66675)  
 31 \*judgment/ or "clinical judgment (not diagnosis)/ (24848)  
 32 (perceive\* or perception\* or personal satisfaction or perspective\* or view\* or experience\* or  
 need\* or issue\*).ti,ab. (2162115)  
 33 (belief\* or believe\* or opinion\* or feel\* or knowledge\* or understand\* or expectation\* or  
 attitude\* or thought\*).ti,ab. (1460682)  
 34 or/26-33 (2849768)  
 35 12 and 25 and 34 (466)  
 36 limit 35 to english language (439)

\*\*\*\*\*

## PROQUEST SEARCH STRATEGY

### ProQuest CENTRAL (40 results)/SCOPUS (30 results)/WoS (25 results)

"mental health practitioner\*" OR psychiatrist\* OR psychologist\* OR therapist\* OR  
 "social work\*" OR ("mental health" NEAR/3 (consultant\* OR trainee\* OR  
 personnel\* OR staff OR professional\* OR counsel\*))

AND

"serious investigation\*" OR "serious untoward incident\*" OR "patient safety  
 event\*" OR "patient safety incident\*" OR "root cause analys?s" OR (safety  
 NEAR/3 inquir\*) OR (incident\* NEAR/3 inquir\*) OR (coron\* NEAR/3 (inquest\* OR  
 court\* OR inquir\*))

AND

perceive\* OR perception\* OR "personal satisfaction" OR perspective\* OR view\*  
 OR experience\* OR need\* OR issue\* OR belief\* OR believe\* OR opinion\* OR  
 feel\* OR knowledge\* OR understand\* OR expectation\* OR attitude\* OR thought\*

English language limit
